# Supplementary material for: Ferromagnetically coupled CoII2LnIII2 complexes (where LnIII = Ho, Er, Yb): experimental and theoretical investigations
Source: Royal Society of Chemistry journal article supplement (doi:10.1039/d3ce00827d), 2023-01-01
Supplement: d3ce00827d1.pdf [file d3ce00827d1.pdf]

## Supporting Information

### Ferromagnetically coupled $\text{Co}^{\text{II}}\text{Ln}^{\text{III}}_2$ complexes (where $\text{Ln}^{\text{III}} = \text{Ho}, \text{Er}, \text{Yb}$ ): Experimental and theoretical investigations

Naushad Ahmed <sup>a</sup> \* and Prem Prakash Sahu <sup>b</sup>

<sup>a</sup> Department of Chemistry, Indian Institute of Technology Bombay, Powai, Mumbai, Maharashtra, India 400076. Email: [naushad.chem@gmail.com](mailto:naushad.chem@gmail.com)

<sup>b</sup> Department of Chemistry, Indian Institute of Technology Hyderabad, Kandi, Sangareddy, India 502285

**Table S1.** Crystallographic parameters for complexes **1** and **3**

| Complex                                     | <b>1</b>                                                                   | <b>3</b>                                                                   |
|---------------------------------------------|----------------------------------------------------------------------------|----------------------------------------------------------------------------|
| Formula                                     | $\text{C}_{74}\text{H}_{101}\text{N}_7\text{O}_{37}\text{Co}_2\text{Ho}_2$ | $\text{C}_{74}\text{H}_{101}\text{N}_7\text{O}_{37}\text{Co}_2\text{Yb}_2$ |
| Size [mm]                                   | 0.40 x 0.31 x 0.230                                                        | 0.14 x 0.12 x 0.10                                                         |
| System                                      | Monoclinic                                                                 | Monoclinic                                                                 |
| Space group                                 | $C2/c$                                                                     | $C2/c$                                                                     |
| $a$ [Å]                                     | 26.692(7)                                                                  | 26.7585(7)                                                                 |
| $b$ [Å]                                     | 15.981(4)                                                                  | 16.0409(5)                                                                 |
| $c$ [Å]                                     | 19.803(5)                                                                  | 19.8206(6)                                                                 |
| $\alpha$ [°]                                | 90                                                                         | 90                                                                         |
| $\beta$ [°]                                 | 96.761(3)                                                                  | 96.400(3)                                                                  |
| $\gamma$ [°]                                | 90                                                                         | 90                                                                         |
| $V$ [Å <sup>3</sup> ]                       | 8389(4)                                                                    | 8454.6(4)                                                                  |
| $Z$                                         | 4                                                                          | 4                                                                          |
| $\rho_{\text{calcd}}$ [g/cm <sup>-3</sup> ] | 1.664                                                                      | 1.685                                                                      |
| $2\theta_{\text{max}}$                      | 49.98                                                                      | 50.00                                                                      |
| radiation                                   | Mo $K_{\alpha}$                                                            | Mo $K_{\alpha}$                                                            |
| $\lambda$ [Å]                               | 0.71070                                                                    | 0.71070                                                                    |
| $T$ [K]                                     | 100                                                                        | 100                                                                        |
| Reflns                                      | 11275                                                                      | 7455                                                                       |
| Ind. Reflns                                 | 10035                                                                      | 6042                                                                       |
| reflns with<br>$I > 2\sigma(I)$             | 10035                                                                      | 11876                                                                      |
| $R1$                                        | 0.0455                                                                     | 0.0413                                                                     |
| $wR2$                                       | 0.0930                                                                     | 0.0946                                                                     |

**Table S2.** Continuous Shape Measurement (CShM) analysis for Ln1 and Co1 sites in complexes **1** and **3**

**3**

| Geometry around LnIII | Ln1 site     |              | Geometry around Ln <sup>III</sup> | Co1 site     |              |
|-----------------------|--------------|--------------|-----------------------------------|--------------|--------------|
|                       | Complex 1    | Complex 2    |                                   | Complex 1    | Complex 2    |
| <b>OP-8</b>           | 29.014       | 29.222       | <b>HP-6</b>                       | 33.681       | 33.549       |
| <b>HPY-8</b>          | 23.361       | 23.140       | <b>PPY-6</b>                      | 21.898       | 21.910       |
| <b>HBPY-8</b>         | 13.296       | 13.544       | <b>OC-6</b>                       | <b>2.133</b> | <b>2.203</b> |
| <b>CU-8</b>           | 8.698        | 9.124        | <b>TPR-6</b>                      | 8.466        | 8.259        |
| <b>SAPR-8</b>         | 1.553        | 1.586        | <b>JPPY-6</b>                     | 25.288       | 25.289       |
| <b>TDD-8</b>          | 2.769        | 2.835        |                                   |              |              |
| <b>JGBF-8</b>         | 11.715       | 11.587       |                                   |              |              |
| <b>JETBPY-8</b>       | 25.321       | 24.873       |                                   |              |              |
| <b>JBTPR-8</b>        | 2.056        | 1.983        |                                   |              |              |
| <b>BTPR-8</b>         | <b>1.382</b> | <b>1.468</b> |                                   |              |              |
| <b>JSD-8</b>          | 4.102        | 3.624        |                                   |              |              |
| <b>TT-8</b>           | 9.455        | 9.840        |                                   |              |              |

  

|                                                                                                                                                                                                                                                                                                                                                                                                                                                                                                                                                                                                                                                                                                                                                                     |                                                                                                                                                                                                                                                                |
|---------------------------------------------------------------------------------------------------------------------------------------------------------------------------------------------------------------------------------------------------------------------------------------------------------------------------------------------------------------------------------------------------------------------------------------------------------------------------------------------------------------------------------------------------------------------------------------------------------------------------------------------------------------------------------------------------------------------------------------------------------------------|----------------------------------------------------------------------------------------------------------------------------------------------------------------------------------------------------------------------------------------------------------------|
| <p><b>OP-8</b> <math>D_{8h}</math> Octagon, <b>HPY-8</b> <math>C_{7v}</math> Heptagonal pyramid, <b>HBPY-8</b> <math>D_{6h}</math> Hexagonal bipyramid, <b>CU-8</b> <math>O_h</math> Cube, <b>SAPR-8</b> <math>D_{4d}</math> Square antiprism, <b>TDD-8</b> <math>D_{2d}</math> Triangular dodecahedron, <b>JGBF-8</b> <math>D_{2d}</math> Johnson gyrobifastigium J26, <b>JETBPY-8</b> <math>D_{3h}</math> Johnson elongated triangular bipyramid J14, <b>JBTPR-8</b> <math>C_{2v}</math> Biaugmented trigonal prism J50, <b>BTPR-8</b> <math>C_{2v}</math> Biaugmented trigonal prism, <b>JSD-8</b> <math>D_{2d}</math> Snub diphenoid J84, <b>TT-8</b> <math>T_d</math> Triakis tetrahedron, <b>ETBPY-8</b> <math>D_{3h}</math> Elongated trigonal bipyramid</p> | <p><b>HP-6</b> <math>D_{6h}</math> Hexagon, <b>PPY-6</b> <math>C_{5v}</math> Pentagonal pyramid, <b>OC-6</b> <math>O_h</math> Octahedron, <b>TPR-6</b> <math>D_{3h}</math> Trigonal prism, <b>JPPY-6</b> <math>C_{5v}</math> Johnson pentagonal pyramid J2</p> |
|---------------------------------------------------------------------------------------------------------------------------------------------------------------------------------------------------------------------------------------------------------------------------------------------------------------------------------------------------------------------------------------------------------------------------------------------------------------------------------------------------------------------------------------------------------------------------------------------------------------------------------------------------------------------------------------------------------------------------------------------------------------------|----------------------------------------------------------------------------------------------------------------------------------------------------------------------------------------------------------------------------------------------------------------|

  

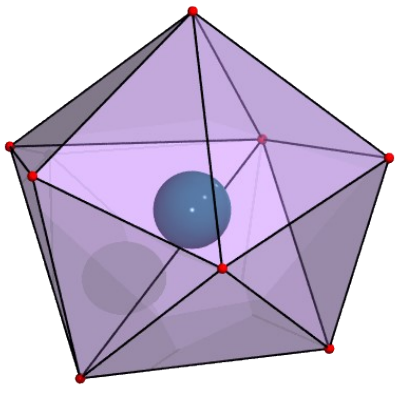



**Table S3:** Selected Bond angles and bond lengths for complexes **1** and **3**.

| <b>Bonds</b>                        | <b>1</b>   | <b>3</b>   |
|-------------------------------------|------------|------------|
| <b>Bond Lengths(Å)</b>              |            |            |
| Co1-O11                             | 2.043(4)   | 2.037(4)   |
| Co1-N11                             | 2.069(5)   | 2.056(5)   |
| Co1-O13                             | 2.144(4)   | 2.140(4)   |
| Co1-N31                             | 2.057(5)   | 2.051(5)   |
| Co1-O31                             | 2.065(4)   | 2.053(4)   |
| Co1-O33                             | 2.141(4)   | 2.138(4)   |
| Ln1-O11                             | 2.280(5)   | 2.241(4)   |
| Ln1-O12                             | 2.590(4)   | 2.576(4)   |
| Ln1-O31                             | 2.337(4)   | 2.312(4)   |
| Ln1-O32                             | 2.548(4)   | 2.535(4)   |
| Ln1-O51                             | 2.356(4)   | 2.227(4)   |
| Ln1-O61                             | 2.270(4)   | 2.317(4)   |
| Ln1-O71                             | 2.337(4)   | 2.286(4)   |
| Ln1-O1w                             | 2.340(5)   | 2.291(4)   |
| <b>Bond Angle (°)</b>               |            |            |
| Co1-O11-Ln1                         | 108.22(16) | 108.10(15) |
| Co1-O31-Ln1                         | 105.37(16) | 104.93(15) |
| <b>Dihedral Angle (°)</b>           |            |            |
| Co1-O11-Ln1-O31                     | 9.89       | 9.84       |
| <b>Intermetallic separation (Å)</b> |            |            |
| Co1-Ln1                             | 3.505(4)   | 3.464(8)   |
| Ln1-Ln1#                            | 4.583(6)   | 4.579(5)   |

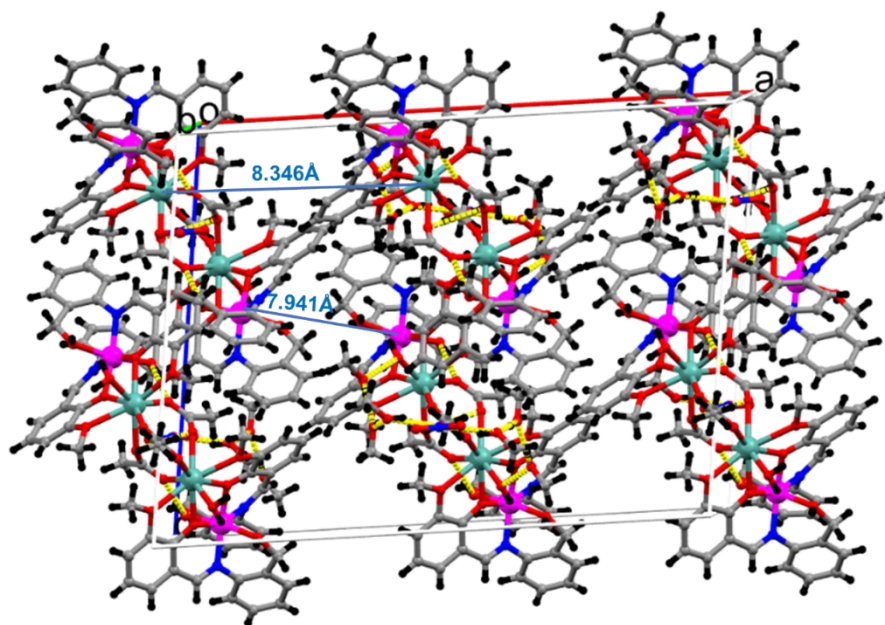

**Figure S1.** Packing structure of representative complex **1**. Yellow dotted bonds are the inter or intramolecular hydrogen bonding.

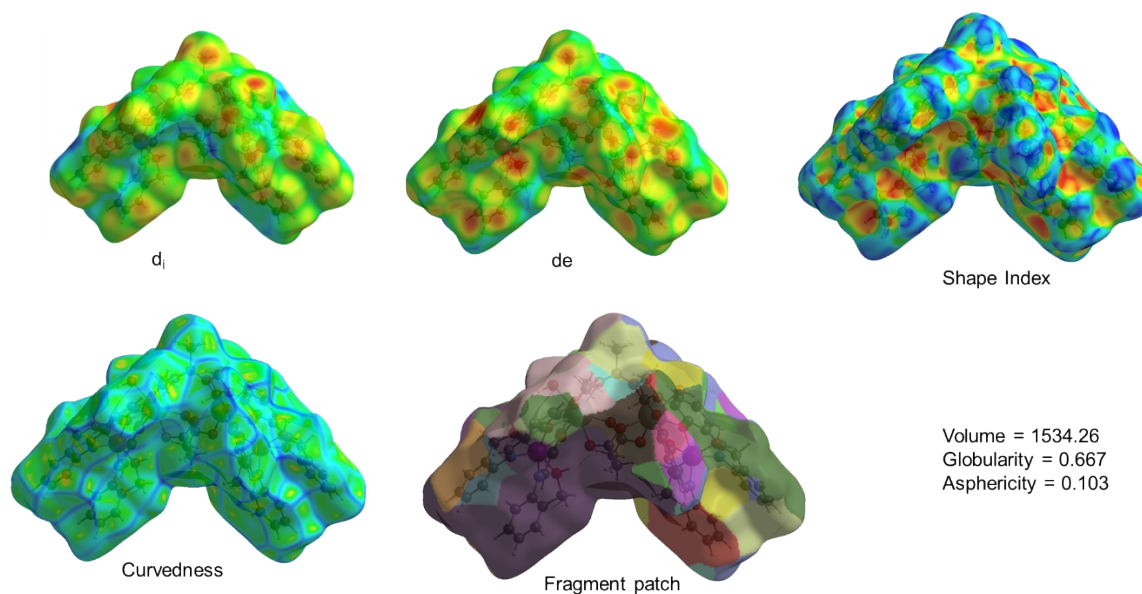

**Figure S2.** Different view of Hirshfeld surface analysis performed on complex **1**.

## Computational Details

To rationalized our experimental findings, we have performed computational studies on all the complexes. The details of computational studies are below

### ***Ab Initio calculations***

All magnetic centers in **1**, **2<sup>mod</sup>** and **3** were *ab initio* computed (irrespective of their crystallographic symmetry) using MOLCAS 8.0<sup>1</sup> software package. At a time one paramagnetic center kept active while rest of the centers replaced by diamagnetic counter parts i.e paramagnetic Ho<sup>III</sup>, Er<sup>III</sup> and Yb<sup>III</sup> ions were replaced by diamagnetic Lu<sup>III</sup> ions while paramagnetic Co<sup>II</sup> ions by diamagnetic Zn<sup>II</sup> ions. For calculations of the Spin-Hamiltonian parameters in the complete active space self-consistent field (CASSCF)<sup>2</sup> framework, the active space is comprised of the CAS (n,7) (where n = 10, 11, and 13, representing the number of active electrons in the seven 4f-based active orbitals of Ho<sup>III</sup>, Er<sup>III</sup>, and Yb<sup>III</sup> for the Ln<sup>III</sup> ion-centered respectively. CAS (7,5), i.e., seven active electrons in the five active d-orbitals, was employed for Co<sup>II</sup>-ion 3d-center. The ANO-RCC library<sup>3, 4</sup> was utilized for the basis set, with the complete basis set contraction scheme provided in Table S4. For Co<sup>II</sup>, all the 10 quartet and 40 doublets states were taken into account during the computation procedure. For Ho<sup>III</sup>, 35 quintets and 105 triplets were considered. Similarly, for Er<sup>III</sup> 35 quartets and 112 doublets were taken while for Yb<sup>III</sup> 7 doublets were used for CASSCF-framework computation. The computed spin-free states for each Ln<sup>III</sup> center were subsequently mixed using a spin-orbit restricted active space spin-interaction (SO-RASSI)<sup>5</sup> to calculate the spin-orbit states. These computed spin-orbit states were taken to the SINGLE\_ANISO<sup>6</sup> module to extract the g-values, crystal field parameters, ab initio blockade barrier, and d.c. magnetic properties (magnetic susceptibility and magnetization). Resolution of identity Cholesky decomposition (RICD)<sup>7</sup> was turned on to save the disk space. Lastly using the POLY\_ANISO<sup>8, 9</sup> module, dc magnetic properties were simulated to extract the magnetic exchange interaction (dipolar + exchange contribution) between the Co-Ln and Ln-Ln pairs respectively.

### **BS-DFT calculations**

We used an all-electron scalar relativistic effect (SARC) basis set for Gd<sup>10</sup> and Douglas-Kroll-Hess approximation,<sup>11</sup> DKH-adapted reconstructed versions of def2-type basis sets for the remaining atoms; DKH-def2-TZVPP for Co<sup>II</sup>; DKH-def2-TZVP for the atoms in the first coordination sphere (N and O), and DKH-def2-SVP for C, and H atoms. Grimme's dispersion with Becke-Johnson damping (D3BJ)<sup>12, 13</sup> was incorporated to account for the dispersion interaction as implemented in the ORCA. The resolution-of-identity-chain-of-spheres (RIJCOSX) formalism, along with the large GRID setting "GRID6" criterion, was turned on to speed up the calculations.<sup>14, 15</sup> The spin-flip method included within ORCA was used to carry out BS-DFT by flipping the spin of the Co<sup>II</sup> center.

**Table S4.** Basis set used in calculations using MOLCAS 8.0 code.

| Element    | Basis set               |
|------------|-------------------------|
| C          | ANO-RCC...3s2p.         |
| H          | ANO-RCC...2s.           |
| N , O      | ANO-RCC...3s2p1d.       |
| Zn         | ANO-RCC...5s4p2d.       |
| Co         | ANO-RCC...6s5p3d2f1g.   |
| Ho, Er, Yb | ANO-RCC...8s7p5d3f2g1h. |
| Lu         | ANO-RCC...7s6p4d2f.     |

**Table S5.** The CASSCF computed g-tensors along with the axial (D) and transverse (E) magnetic

|                  | $g_x$  | $g_y$  | $g_z$  | D / cm <sup>-1</sup> | E / cm <sup>-1</sup> | E/D    |
|------------------|--------|--------|--------|----------------------|----------------------|--------|
| <b>Complex 1</b> |        |        |        |                      |                      |        |
| Co1              | 2.0545 | 2.3385 | 2.8056 | -58.8310             | 17.9966              | 0.3059 |
| Co2              | 2.0523 | 2.3407 | 2.8048 | -58.8216             | 17.9970              | 0.3059 |
| <b>Complex 3</b> |        |        |        |                      |                      |        |
| Co1              | 2.0219 | 2.3055 | 2.8704 | -67.5027             | 17.7658              | 0.2630 |
| Co2              | 2.0283 | 2.3014 | 2.8676 | -67.4912             | 17.7604              | 0.2631 |

anisotropies for Co(II) ions in complexes **1** and **3**.

**Table S6.** SO-RASSI computed low lying energies (cm<sup>-1</sup>) of spin-free states of the individual Co<sup>II</sup> centers in complexes **1** and **3**.

| Complex 1 |           | Complex 3 |           |
|-----------|-----------|-----------|-----------|
| Co1       |           | Co1       |           |
| 0         | 30636.524 | 0         | 30808.262 |
| 799.196   | 31193.686 | 693.07    | 31303.437 |
| 1708.773  | 32294.969 | 1815.925  | 32519.02  |
| 6404.823  | 32905.526 | 6773.563  | 33025.821 |
| 7983.502  | 34440.085 | 8216.427  | 34699.434 |
| 8420.809  | 35264.171 | 8573.837  | 35657.419 |
| 15518.956 | 35480.63  | 15950.87  | 35757.872 |
| 23007.096 | 35636.942 | 23241.001 | 35862.744 |
| 24689.428 | 36734.475 | 24876.335 | 37099.152 |
| 26271.890 | 36794.611 | 26416.522 | 37165.289 |
| 13614.934 | 36993.019 | 13399.338 | 37390.845 |
| 16315.56  | 37146.651 | 15943.791 | 37571.14  |
| 19379.376 | 46652.758 | 19438.198 | 46741.601 |

|           |           |           |           |
|-----------|-----------|-----------|-----------|
| 19713.053 | 47465.896 | 19715.907 | 47457.405 |
| 20365.051 | 47705.492 | 20366.832 | 47839.085 |
| 20853.583 | 48409.004 | 20822.984 | 48485.136 |
| 21316.839 | 48908.18  | 21259.323 | 49085.359 |
| 21818.008 | 49334.074 | 21758.109 | 49524.109 |
| 25430.008 | 49607.916 | 25475.504 | 49829.802 |
| 25517.322 | 71219.552 | 25741.406 | 71427.106 |
| 26147.629 | 71659.525 | 26154.675 | 71758.857 |
| 26530.777 | 72366.991 | 26587.024 | 72469.482 |
| 28667.922 | 74369.79  | 28756.959 | 74490.336 |
| 29383.423 | 74610.191 | 29453.819 | 74749.969 |
| 29694.007 |           | 29868.227 |           |
| 30424.319 |           | 30673.723 |           |

**Table S7.** SO-RASSI computed low lying energies ( $\text{cm}^{-1}$ ) of spin-orbit states of Co1 center in complex **1**.

| Complex 1 |           |           |           |           |
|-----------|-----------|-----------|-----------|-----------|
| Co1 site  |           |           |           |           |
| 0         | 15814.081 | 25690.699 | 35437.422 | 49919.469 |
| 133.141   | 15814.081 | 26273.191 | 35437.422 | 71503.596 |
| 133.141   | 16547.039 | 26273.191 | 35679.607 | 71503.596 |
| 936.801   | 16547.039 | 26641.457 | 35679.607 | 71941.284 |
| 936.801   | 19585.586 | 26641.457 | 36166.374 | 71941.284 |
| 1165.192  | 19585.586 | 26852.544 | 36166.374 | 72701.36  |
| 1165.192  | 19984.423 | 26852.544 | 36863.358 | 72701.36  |
| 1948.59   | 19984.423 | 27240.011 | 36863.358 | 74577.013 |
| 1948.59   | 20578.675 | 27240.011 | 37154.472 | 74577.013 |
| 2051.68   | 20578.675 | 28940.863 | 37154.472 | 75023.619 |
| 2051.68   | 21173.838 | 28940.863 | 37432.181 | 75023.619 |
| 6643.254  | 21173.838 | 29717.303 | 37432.181 |           |
| 6643.254  | 21603.887 | 29717.303 | 37798.643 |           |



|           |           |           |           |  |
|-----------|-----------|-----------|-----------|--|
| 6717.653  | 21603.887 | 29991.72  | 37798.643 |  |
| 6717.653  | 22189.448 | 29991.72  | 46869.897 |  |
| 8195.253  | 22189.448 | 30673.591 | 46869.897 |  |
| 8195.253  | 23117.136 | 30673.591 | 47708.293 |  |
| 8249.839  | 23117.136 | 30993.01  | 47708.293 |  |
| 8249.839  | 23194.013 | 30993.01  | 48048.529 |  |
| 8651.834  | 23194.013 | 31442.328 | 48048.529 |  |
| 8651.834  | 24697.081 | 31442.328 | 48690.29  |  |
| 8758.885  | 24697.081 | 32639.811 | 48690.29  |  |
| 8758.885  | 24864.525 | 32639.811 | 49145.877 |  |
| 13857.001 | 24864.525 | 33202.643 | 49145.877 |  |
| 13857.001 | 25467.831 | 33202.643 | 49662.195 |  |
| 15808.699 | 25467.831 | 34642.092 | 49662.195 |  |
| 15808.699 | 25690.699 | 34642.092 | 49919.469 |  |

**Table S8.** SO-RASSI computed low lying energies ( $\text{cm}^{-1}$ ) of spin-orbit states of Co1 center in complex **3**.

| Complex <b>3</b> |           |           |           |           |
|------------------|-----------|-----------|-----------|-----------|
| Co1 site         |           |           |           |           |
| 0                | 16188.603 | 25895.436 | 34925.708 | 50155.745 |
| 0                | 16254.009 | 25895.436 | 35770.318 | 50155.745 |
| 148.371          | 16254.009 | 26402.28  | 35770.318 | 71720.643 |
| 148.371          | 16265.05  | 26402.28  | 35971.946 | 71720.643 |
| 869.256          | 16265.05  | 26755.517 | 35971.946 | 72064.453 |
| 869.256          | 19651.836 | 26755.517 | 36496.579 | 72064.453 |
| 1108.661         | 19651.836 | 26909.067 | 36496.579 | 72818.523 |
| 1108.661         | 20005.954 | 26909.067 | 37249.144 | 72818.523 |
| 2058.546         | 20005.954 | 27386.182 | 37249.144 | 74715.88  |
| 2058.546         | 20596.586 | 27386.182 | 37577.764 | 74715.88  |
| 2158.859         | 20596.586 | 29058.639 | 37577.764 | 75176.758 |
| 2158.859         | 21165.679 | 29058.639 | 37816.096 | 75176.758 |

|           |           |           |           |  |
|-----------|-----------|-----------|-----------|--|
| 7024.504  | 21165.679 | 29827.695 | 37816.096 |  |
| 7024.504  | 21565.788 | 29827.695 | 38194.736 |  |
| 7096.518  | 21565.788 | 30156.035 | 38194.736 |  |
| 7096.518  | 22146.724 | 30156.035 | 46968.503 |  |
| 8442.583  | 22146.724 | 30940.933 | 46968.503 |  |
| 8442.583  | 23354.579 | 30940.933 | 47740.346 |  |
| 8494.768  | 23354.579 | 31174.046 | 47740.346 |  |
| 8494.768  | 23439.748 | 31174.046 | 48181.398 |  |
| 8822.642  | 23439.748 | 31574.004 | 48181.398 |  |
| 8822.642  | 24878.296 | 31574.004 | 48782.93  |  |
| 8931.83   | 24878.296 | 32867.395 | 48782.93  |  |
| 8931.83   | 25061.402 | 32867.395 | 49343.248 |  |
| 13660.448 | 25061.402 | 33342.73  | 49343.248 |  |
| 13660.448 | 25581.699 | 33342.73  | 49865.479 |  |
| 16188.603 | 25581.699 | 34925.708 | 49865.479 |  |

**Table S9.** SO-RASSI computed low lying energies ( $\text{cm}^{-1}$ ) of spin-free states of Ho1 center in complex **1**.

| Ho1 site |           |           |           |           |
|----------|-----------|-----------|-----------|-----------|
| 0        | 45633.692 | 27475.796 | 32445.109 | 37385.957 |
| 10.015   | 45735.348 | 29477.792 | 32478.752 | 38944.94  |
| 100.898  | 45881.127 | 29498.982 | 33366.807 | 38946.647 |
| 134.381  | 46186.391 | 29524.818 | 33408.249 | 38948.139 |
| 148.065  | 46251.729 | 29538.145 | 33475.996 | 38950.213 |
| 180.54   | 21435.006 | 29570.977 | 35565.372 | 38961.159 |
| 231.855  | 21435.422 | 29578.851 | 35565.381 | 38963.242 |
| 277.943  | 21445.893 | 29598.374 | 35743.156 | 38969.965 |
| 307.655  | 21446.922 | 29652.892 | 35743.259 | 38982.482 |
| 310.646  | 21450.96  | 29655.398 | 35834.665 | 38985.349 |
| 339.432  | 21451.192 | 29819.839 | 35835.978 | 38996.996 |
| 393.583  | 21458.59  | 29819.941 | 35903.349 | 38998.497 |

|           |           |           |           |           |
|-----------|-----------|-----------|-----------|-----------|
| 406.579   | 21459.021 | 29892.267 | 35908.818 | 39001.46  |
| 17790.063 | 21464.836 | 29893.156 | 35965.195 | 39001.641 |
| 17848.251 | 21472.932 | 29979.933 | 35973.234 | 44728.023 |
| 17977.741 | 21477.931 | 29984.572 | 36011.314 | 44757.343 |
| 17992.86  | 21484.125 | 30005.549 | 36014.77  | 44892.357 |
| 18001.952 | 21485.935 | 30026.716 | 36023.002 | 44957.193 |
| 18042.585 | 21491.857 | 30035.01  | 36073.891 | 44999.397 |
| 18125.068 | 21492.272 | 30063.903 | 36079.827 | 45156.251 |
| 18156.454 | 27204.143 | 30071.339 | 36204.08  | 45186.666 |
| 27983.761 | 27207.785 | 30104.238 | 36205.138 |           |
| 28034.449 | 27275.28  | 30105.215 | 36315.908 |           |
| 28049.967 | 27287.129 | 30119.136 | 36316.068 |           |
| 28083.102 | 27323.751 | 30119.158 | 37012.637 |           |
| 28149.768 | 27335.669 | 30210.751 | 37101.443 |           |
| 28175.113 | 27372.798 | 30210.78  | 37175.172 |           |
| 28251.01  | 27390.77  | 32287.579 | 37213.195 |           |
| 28350.01  | 27396.726 | 32301.456 | 37311.69  |           |
| 28360.173 | 27475.071 | 32399.005 | 37375.091 |           |

**Table S10.** SO-RASSI computed low lying energies (cm<sup>-1</sup>) of spin-orbit states of Ho1 center in complex **1**

| Ho1 site       |           |           |           |           |           |           |           |           |           |           |           |           |           |           |           |           |
|----------------|-----------|-----------|-----------|-----------|-----------|-----------|-----------|-----------|-----------|-----------|-----------|-----------|-----------|-----------|-----------|-----------|
| <b>0</b>       | 5336.748  | 13943.957 | 25505.958 | 27468.783 | 30301.608 | 33051.38  | 33795.137 | 38079.663 | 39106.727 | 41757.919 | 42841.727 | 45123.975 | 46167.283 | 47741.938 | 48727.619 | 54363.627 |
| <b>0.935</b>   | 5336.755  | 13960.885 | 25506.367 | 27537.724 | 30303.323 | 33058.484 | 33797.949 | 38082.39  | 39122.835 | 41769.499 | 42842.667 | 45182.103 | 46167.828 | 47743.049 | 48736.046 | 54387.451 |
| <b>65.889</b>  | 8871.104  | 14000.888 | 25513.937 | 28903.606 | 30331.571 | 33059.396 | 33806.877 | 38095.05  | 39333.847 | 41775.707 | 42903.629 | 45189.124 | 46710.343 | 47875.672 | 48742.936 | 55753.123 |
| <b>68.568</b>  | 8871.342  | 14049.905 | 25515.158 | 28903.69  | 30342.17  | 33092.58  | 33813.174 | 38116.591 | 39356.62  | 41781.22  | 42904.792 | 45224.808 | 46720.893 | 47893.596 | 48747.493 | 55760.784 |
| <b>108.956</b> | 8912.048  | 14063.74  | 25520.028 | 28907.054 | 30348.759 | 33092.622 | 33820.143 | 38126.813 | 39368.274 | 41785.585 | 42973.927 | 45242.288 | 46738.964 | 47953.002 | 48754.599 | 55796.472 |
| <b>112.429</b> | 8914.118  | 20579.804 | 25520.875 | 28908.299 | 30367.818 | 33157.373 | 34529.112 | 38146.034 | 39375.536 | 41794.412 | 42998.527 | 45254.787 | 46908.204 | 47976.429 | 48762.378 | 55850.313 |
| <b>153.158</b> | 8925.238  | 20580.123 | 25522.065 | 28909.908 | 30378.869 | 33157.509 | 34533.776 | 38150.098 | 39386.212 | 41806.961 | 43012.1   | 45305.11  | 46917.245 | 47990.971 | 48764.923 | 55863.909 |
| <b>178.478</b> | 8930.759  | 20638.325 | 25522.766 | 28911.859 | 30404.624 | 33222.362 | 34548.569 | 38517.225 | 39403.639 | 41903.54  | 43043.054 | 45306.425 | 46925.616 | 48053.677 | 48772.175 | 56575.309 |
| <b>191.694</b> | 8948.665  | 20641.953 | 25524.917 | 28913.469 | 30407.986 | 33222.826 | 34554.211 | 38517.239 | 39417.49  | 41904.33  | 43055.03  | 45391.223 | 46938.025 | 48061.176 | 48778.589 | 56710.32  |
| <b>197.216</b> | 8959.154  | 20683.799 | 25525.485 | 28914.617 | 30436.904 | 33250.24  | 34562.207 | 38581.457 | 40166.797 | 41957.986 | 43079.865 | 45391.331 | 46951.651 | 48151.603 | 48780.234 | 56886.279 |
| <b>214.523</b> | 8966.026  | 20699.321 | 25531.824 | 28915.595 | 30437.49  | 33254.583 | 34566.273 | 38581.771 | 40166.799 | 41965.183 | 43085.927 | 45488.352 | 46967.338 | 48151.845 | 48787.797 | 57165.18  |
| <b>221.431</b> | 9001.869  | 20715.068 | 25534.221 | 28917.226 | 32843.831 | 33277.309 | 34579.124 | 38651.287 | 40326.975 | 41995.797 | 43089.788 | 45488.359 | 46969.986 | 48277.128 | 48794.088 | 57386.04  |
| <b>225.312</b> | 9003.42   | 20738.231 | 25535.164 | 28918.408 | 32847.802 | 33288.795 | 34595.29  | 38655.927 | 40327.002 | 42015.382 | 43095.15  | 45529.433 | 46974.502 | 48277.345 | 48803.768 | 57394.038 |
| <b>244.91</b>  | 9046.342  | 20741.022 | 25538.909 | 28920.119 | 32867.944 | 33303.341 | 34595.624 | 38674.751 | 40418.832 | 42029.131 | 43179.312 | 45540.634 | 46980.466 | 48388.667 | 48810.263 | 57493.454 |
| <b>247.171</b> | 9046.657  | 20779.485 | 25540.077 | 28921.87  | 32884.44  | 33321.562 | 34598.932 | 38678.784 | 40419.201 | 42060.545 | 43179.84  | 45581.597 | 47206.508 | 48389.135 | 48877.794 | 57518.524 |
| <b>316.575</b> | 11641.059 | 20779.62  | 25551.357 | 28926.102 | 32889.498 | 33325.263 | 34602.897 | 38693.503 | 40480.399 | 42068.358 | 43705.627 | 45624.044 | 47208.255 | 48465.599 | 48878.083 | 57556.443 |
| <b>316.78</b>  | 11641.581 | 23616.625 | 25551.431 | 28927.299 | 32893.003 | 33363.912 | 36590.141 | 38696.073 | 40482.443 | 42135.217 | 43714.346 | 45631.747 | 47232.79  | 48466.609 | 53591.59  | 57635.322 |
| 5139.382       | 11680.406 | 23617.207 | 25723.038 | 29496.26  | 32902.883 | 33364.565 | 36631.617 | 38703.389 | 40542.148 | 42135.583 | 43788.09  | 46094.469 | 47239.163 | 48509.269 | 53592.939 | 57646.227 |
| 5139.524       | 11683.097 | 23621.376 | 25732.577 | 29497.459 | 32932.645 | 33408.042 | 36660.335 | 38713.927 | 40546.733 | 42479.875 | 43789.423 | 46094.604 | 47253.334 | 48522.565 | 53663.455 | 63036.041 |
| 5179.429       | 11700.571 | 23625.988 | 25757.02  | 29519.67  | 32941.311 | 33408.183 | 36667.273 | 38726.311 | 40589.301 | 42841.727 | 43822.754 | 46113.913 | 47720.08  | 48535.611 | 53677.894 | 63061.666 |
| 5180.588       | 11709.33  | 23626.33  | 25783.968 | 29524.503 | 33001.288 | 33482.008 | 36675.734 | 38733.531 | 40598.102 | 42842.667 | 43850.478 | 46114.551 | 47720.656 | 48578.77  | 53709.869 | 63185.643 |
| 5212.894       | 11723.446 | 23814.87  | 25796.918 | 29532.563 | 33002.655 | 33482.019 | 36700.937 | 38734.947 | 40615.359 | 42903.629 | 43869.049 | 46121.241 | 47722.669 | 48580.975 | 53790.442 | 63326.605 |
| 5221.034       | 11756.125 | 23815.821 | 25836.91  | 29536.963 | 33007.462 | 33714.512 | 36720.476 | 38743.861 | 40628.82  | 42904.792 | 43949.236 | 46123.214 | 47726.132 | 48656.984 | 53801.67  | 63337.902 |
| 5226.816       | 11759.363 | 23851.549 | 25849.675 | 29546.634 | 33011.629 | 33718.27  | 37081.479 | 38772.629 | 40630.951 | 42973.927 | 43950.91  | 46129.561 | 47727.423 | 48657.743 | 53956.839 |           |
| 5236.798       | 11807.008 | 23869.553 | 26775.613 | 29559.673 | 33017.439 | 33736.183 | 37091.505 | 38773.997 | 40697.546 | 42998.527 | 44808.02  | 46135.642 | 47728.177 | 48667.221 | 53959.977 |           |
| 5245.621       | 11808.51  | 23905.049 | 26788.936 | 29572.485 | 33020.282 | 33744.443 | 37140.742 | 38799.467 | 40699.605 | 43012.1   | 44808.024 | 46142.7   | 47730.326 | 48667.721 | 54193.546 |           |
| 5261.723       | 13815.272 | 23926.756 | 26812.333 | 29587.829 | 33025.812 | 33752.747 | 37210.148 | 38799.652 | 40815.049 | 43043.054 | 44947.91  | 46148.85  | 47732.568 | 48696.424 | 54206.46  |           |

|          |           |           |           |           |           |           |           |           |           |           |           |           |           |           |           |  |
|----------|-----------|-----------|-----------|-----------|-----------|-----------|-----------|-----------|-----------|-----------|-----------|-----------|-----------|-----------|-----------|--|
| 5263.752 | 13843.327 | 23933.668 | 26849.428 | 29591.671 | 33039.343 | 33760.776 | 37212.408 | 38879.564 | 40815.354 | 43055.03  | 44947.96  | 46152.279 | 47733.564 | 48698.348 | 54263.459 |  |
| 5285.421 | 13914.743 | 23965.441 | 26855.857 | 29625.838 | 33041.152 | 33769.444 | 38056.488 | 38879.597 | 40910.858 | 43079.865 | 45046.461 | 46156.103 | 47736.349 | 48709.726 | 54274.426 |  |
| 5285.674 | 13925.715 | 23970.706 | 27410.233 | 29626.241 | 33051.01  | 33785.902 | 38062.403 | 39089.325 | 40910.912 | 43085.927 | 45047     | 46156.812 | 47740.212 | 48713.714 | 54323.461 |  |

**Table S11.** SO-RASSI computed low lying energies (cm<sup>-1</sup>) of spin-free and spin-orbit states of Yb1 center in complex **3**.

| Yb1 site  |                  |           |
|-----------|------------------|-----------|
| Spin-free | Spin-orbit state |           |
| 0.00      | 0.00             | 439.702   |
| 82.922    | 0.00             | 10336.058 |
| 288.233   | 199.746          | 10336.058 |
| 314.503   | 199.746          | 10539.773 |
| 378.773   | 321.035          | 10539.773 |
| 503.839   | 321.035          | 10699.771 |
| 532.738   | 439.702          | 10699.771 |

**Table S12.** SINGLE\_ANISO computed wave function decomposition analysis for Ho1 center in complex

1. The major dominating values are kept in bold.

| $\pm mJ$ | wave function decomposition analysis Ho1                                                                                                                                                                |
|----------|---------------------------------------------------------------------------------------------------------------------------------------------------------------------------------------------------------|
| 1        | <b>56.0%</b> $ \pm 8\rangle + 23.6\%$ $ \pm 6\rangle + 15.9\%$ $ \pm 7\rangle$                                                                                                                          |
| 2        | <b>53.0%</b> $ \pm 7\rangle + 23.0\%$ $ \pm 5\rangle + 9.4\%$ $ \pm 6\rangle + 4.9\%$ $ \pm 8\rangle + 4.0\%$ $ \pm 3\rangle$                                                                           |
| 3        | <b>45.3%</b> $ \pm 2\rangle + 21.0\%$ $ 0\rangle + 14.5\%$ $ \pm 3\rangle + 10.8\%$ $ \pm 4\rangle$                                                                                                     |
| 4        | <b>46.1%</b> $ 0\rangle + 15.1\%$ $ \pm 2\rangle + 12.4\%$ $ \pm 6\rangle + 10.0\%$ $ \pm 3\rangle + 9.2\%$ $ \pm 8\rangle$                                                                             |
| 5        | <b>29.5%</b> $ \pm 4\rangle + 17.1\%$ $ \pm 6\rangle + 16.9\%$ $ \pm 8\rangle + 10.0\%$ $ \pm 1\rangle + 8.5\%$ $ \pm 5\rangle + 7.6\%$ $ \pm 7\rangle + 5.7\%$ $ \pm 2\rangle + 4.1\%$ $ \pm 3\rangle$ |
| 6        | <b>27.8%</b> $ \pm 3\rangle + 24.3\%$ $ \pm 4\rangle + 13.3\%$ $ \pm 7\rangle + 13.0\%$ $ \pm 1\rangle + 8.0\%$ $ \pm 5\rangle + 4.8\%$ $ 0\rangle$                                                     |
| 7        | <b>29.3%</b> $ \pm 5\rangle + 17.0\%$ $ \pm 4\rangle + 13.4\%$ $ \pm 6\rangle + 13.4\%$ $ \pm 3\rangle + 9.8\%$ $ \pm 8\rangle + 6.7\%$ $ \pm 7\rangle + 4.5\%$ $ \pm 1\rangle$                         |
| 8        | <b>35.3%</b> $ \pm 6\rangle + 26.7\%$ $ \pm 2\rangle + 22.8\%$ $ \pm 3\rangle + 10.5\%$ $ \pm 4\rangle$                                                                                                 |
| 9        | <b>35.7%</b> $ \pm 1\rangle + 27.3\%$ $ \pm 3\rangle + 16.0\%$ $ 0\rangle + 12.8\%$ $ \pm 1\rangle + 5.6\%$ $ \pm 4\rangle$                                                                             |

**Table S13.** SINGLE\_ANISO computed wave function decomposition analysis for Er1 center in complex **2<sup>mod</sup>**. The major dominating values are kept in bold.

| $\pm mJ$ | <i>wave function decomposition analysis on Er1</i>                                                                                                                                        |
|----------|-------------------------------------------------------------------------------------------------------------------------------------------------------------------------------------------|
| KD1      | <b>84.7%</b> $ \pm 15/2\rangle$ + 8.4% $ \pm 9/2\rangle$                                                                                                                                  |
| KD2      | <b>29.4%</b> $ \pm 7/2\rangle$ + 27.1% $ \pm 5/2\rangle$ + 12.3% $ \pm 1/2\rangle$ + 9.4% $ \pm 3/2\rangle$ + 6.8% $ \pm 11/2\rangle$ + 5.9% $ \pm 13/2\rangle$ + 5.3% $ \pm 9/2\rangle$  |
| KD3      | <b>44.8%</b> $ \pm 13/2\rangle$ + 18.1% $ \pm 11/2\rangle$ + 7.6% $ \pm 9/2\rangle$ + 7.1% $ \pm 7/2\rangle$ + 7.0% $ \pm 5/2\rangle$ + 7.0% $ \pm 3/2\rangle$ + 6.0% $ \pm 1/2\rangle$   |
| KD4      | <b>23.2%</b> $ \pm 3/2\rangle$ + 20.6% $ \pm 9/2\rangle$ + 19.2% $ \pm 11/2\rangle$ + 16.0% $ \pm 1/2\rangle$ + 9.7% $ \pm 7/2\rangle$ + 6.4% $ \pm 13/2\rangle$                          |
| KD5      | <b>25.8%</b> $ \pm 9/2\rangle$ + 20.1% $ \pm 13/2\rangle$ + 18.3% $ \pm 11/2\rangle$ + 16.5% $ \pm 5/2\rangle$ + 12.0% $ \pm 3/2\rangle$ + 4.4% $ \pm 15/2\rangle$                        |
| KD6      | <b>22.8%</b> $ \pm 11/2\rangle$ + 20.6% $ \pm 9/2\rangle$ + 19.0% $ \pm 13/2\rangle$ + 18.4% $ \pm 7/2\rangle$ + 7.2% $ \pm 1/2\rangle$ + 6.0% $ \pm 5/2\rangle$ + 5.6% $ \pm 3/2\rangle$ |
| KD7      | <b>31.7%</b> $ \pm 5/2\rangle$ + 26.1% $ \pm 7/2\rangle$ + 18.4% $ \pm 1/2\rangle$ + 8.8% $ \pm 11/2\rangle$ + 6.8% $ \pm 9/2\rangle$ + 5.6% $ \pm 3/2\rangle$                            |
| KD8      | <b>37.3%</b> $ \pm 1/2\rangle$ + 36.5% $ \pm 3/2\rangle$ + 15.1% $ \pm 5/2\rangle$ + 4.8% $ \pm 9/2\rangle$                                                                               |

**Table S14.** SINGLE\_ANISO computed wave function decomposition analysis for Yb1 center in complex **3**. The major dominating values are kept in bold.

| $\pm mJ$ | <i>wave function decomposition analysis Yb1</i>                                                              |
|----------|--------------------------------------------------------------------------------------------------------------|
| KD1      | <b>83.2%</b> $ \pm 7/2\rangle$ + 11.0% $ \pm 3/2\rangle$                                                     |
| KD2      | <b>77.0%</b> $ \pm 5/2\rangle$ + 10.8% $ \pm 1/2\rangle$ + 10.4% $ \pm 3/2\rangle$                           |
| KD3      | <b>51.8%</b> $ \pm 3/2\rangle$ + 23.9% $ \pm 1/2\rangle$ + 12.5% $ \pm 7/2\rangle$ + 11.7% $ \pm 5/2\rangle$ |
| KD4      | <b>63.2%</b> $ \pm 1/2\rangle$ + 26.2% $ \pm 3/2\rangle$ + 8.0% $ \pm 5/2\rangle$                            |

**Table S15.** BS-DFT computed energies of high-spin and broken-symmetry solution of Co-Gd analogue centers for complex **1** using  $H = -2J(S_1S_2)$  formalism.

| Solution | Energy ( $E_h$ )    | $\rho^{Gd1}$ | $\rho^{Co2}$ | $\langle S^{*2} \rangle$ | $J_{Co-Gd}$<br>( $cm^{-1}$ ) | $J_{Co-Ho}$<br>[[ $(4/7) * J_{Co-Gd}$ ] ( $cm^{-1}$ ) |
|----------|---------------------|--------------|--------------|--------------------------|------------------------------|-------------------------------------------------------|
| HS       | -15139.169025921756 | 7.016        | 2.678        | 30.0154                  | 0.40                         | <b>0.23</b>                                           |
| BS       | -15139.168987786079 | 7.016        | -2.678       | 9.0153                   |                              |                                                       |

*J values are estimated using the following equation,*

$$J = - \frac{E_{HS} - E_{BS}}{\langle S^{*2} \rangle_{HS} - \langle S^{*2} \rangle_{BS}}$$

**Table S16.** BS-DFT computed energies of high-spin and broken-symmetry solution of Co-Gd analogue centres for Co-Yb in complex **3** using  $H = -2J(S_1S_2)$  formalism.

| Solution | Energy ( $E_h$ )    | $\rho^{Gd1}$ | $\rho^{Co2}$ | $\langle S^{*2} \rangle$ | $J_{Co-Gd}$<br>( $cm^{-1}$ ) | $J_{Co-Yb}$<br>[[ $(1/7) * J_{Co-Gd}$ ] ( $cm^{-1}$ ) |
|----------|---------------------|--------------|--------------|--------------------------|------------------------------|-------------------------------------------------------|
| HS       | -15139.128358439193 | 7.011        | 2.671        | 30.0155                  | 0.38                         | <b>0.05</b>                                           |
| BS       | -15139.128322032311 | 7.010        | -2.670       | 9.0153                   |                              |                                                       |



**Table S17.** DFT computed overlap integral values for the seven corresponding 3d-4f orbitals between Co-Gd analogue centers for complex **1**.

| Corresponding 3d-4f orbitals | Overlap Integral value ( $S_{ab}$ ) |
|------------------------------|-------------------------------------|
| 227                          | 0.01812                             |
| 228                          | 0.01434                             |
| 229                          | 0.00890                             |
| 230                          | 0.00000                             |
| 231                          | 0.00000                             |
| 232                          | -0.00000                            |
| 233                          | -0.00000                            |

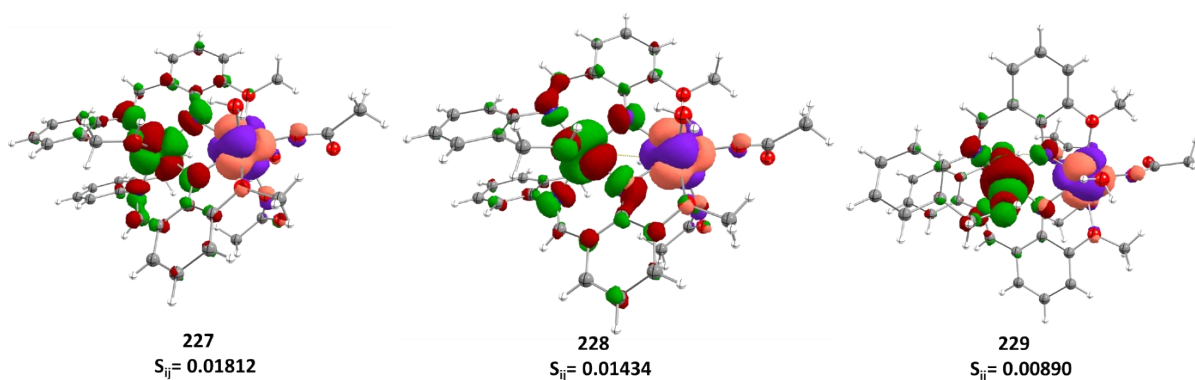

**Figure S4.** The three unrestricted corresponding orbitals (UCO) representing the strongest overlap between the 3d-4f orbitals of Co-Gd analogue centers for complex **1**. The iso-surface value =  $0.03 e^- / \text{bohr}^3$ .

**Table S18.** DFT computed overlap integral values for the seven corresponding 3d-4f orbitals between Co-Gd analogue centers for complex **3**.

| Corresponding 3d-4f orbitals | Overlap Integral value ( $S_{ab}$ ) |
|------------------------------|-------------------------------------|
| 227                          | 0.01936                             |
| 228                          | 0.01529                             |
| 229                          | 0.00974                             |
| 230                          | -0.00000                            |
| 231                          | -0.00000                            |
| 232                          | 0.00000                             |
| 233                          | 0.00000                             |

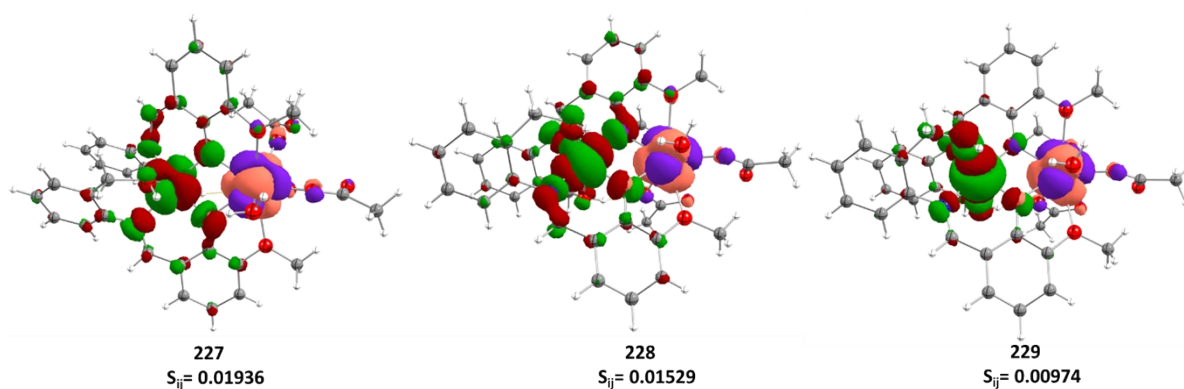

**Figure S5.** The three unrestricted corresponding orbitals (UCO) representing the strongest overlap between the 3d-4f orbitals of Co-Gd analogue centers for complex **3**. The iso-surface value =  $0.03 e^- / \text{bohr}^3$ .

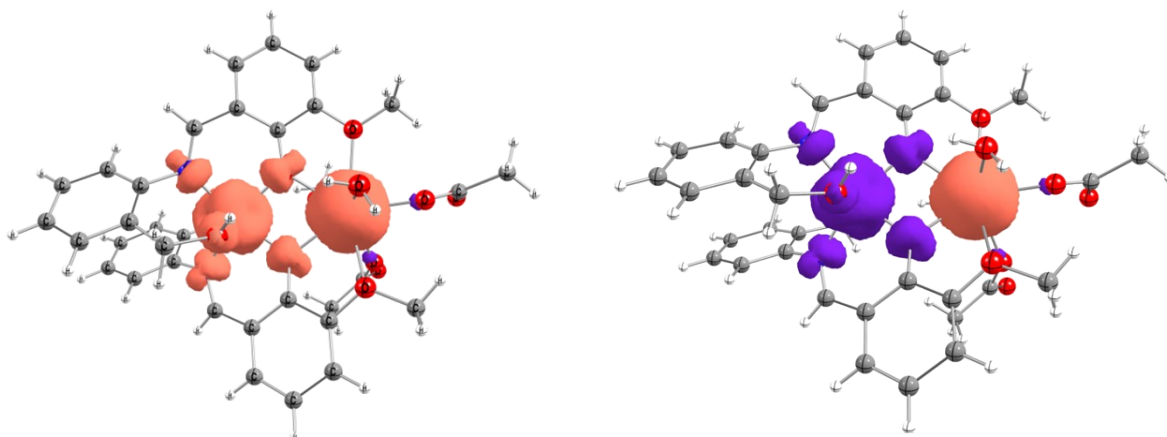

**Figure S6.** DFT computed spin-density plot for Co-Gd analogue centers for complex **1**. The iso-density surface here is constructed with a contour value of  $0.002 \text{ e}^-/\text{bohr}^3$ . The orange and purple colour represents the positive and negative spin densities respectively.

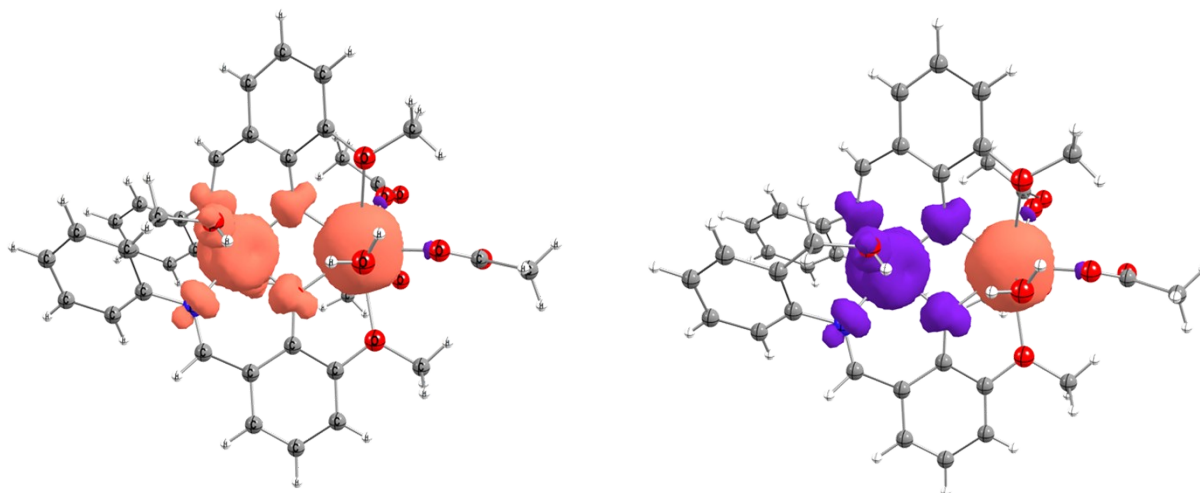

**Figure S7.** DFT computed spin-density plot for Co-Gd analogue centers for complex **3**. The iso-density surface here is constructed with a contour value of  $0.002 \text{ e}^-/\text{bohr}^3$ . The orange and purple colour represents the positive and negative spin densities respectively.

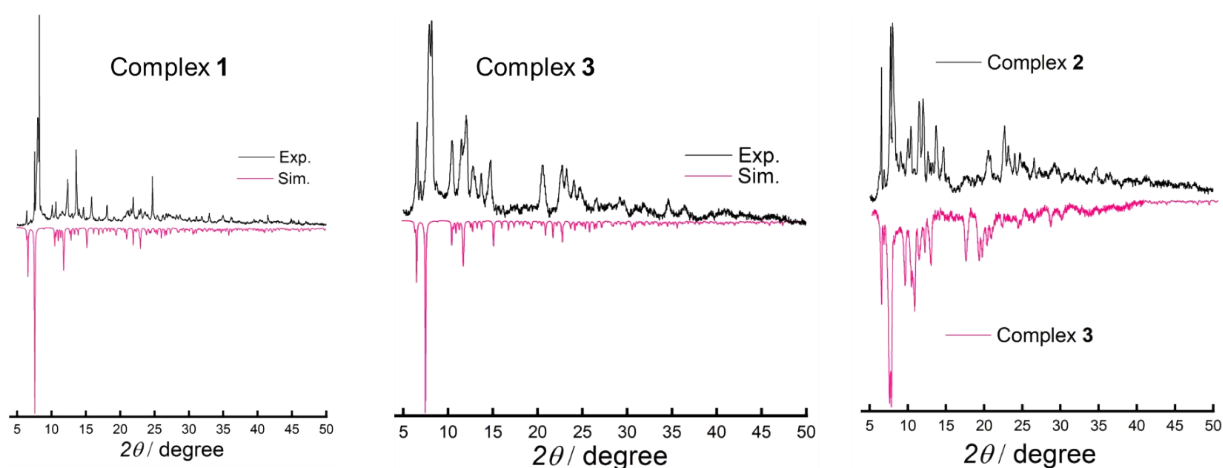

**Figure S8.** Powder X-ray diffraction analysis of complexes 1-3.

## References

1. F. Aquilante, J. Autschbach, R. K. Carlson, L. F. Chibotaru, M. G. Delcey, L. De Vico, I. Fdez. Galván, N. Ferré, L. M. Frutos and L. Gagliardi, Molcas 8: New capabilities for multiconfigurational quantum chemical calculations across the periodic table. *Journal*, 2016.
2. B. O. Roos, P. R. Taylor and P. E. Sigbahn, A complete active space SCF method (CASSCF) using a density matrix formulated super-CI approach, *Chem. Phys.*, 1980, **48**, 157-173.
3. B. O. Roos, V. Veryazov and P.-O. Widmark, Relativistic atomic natural orbital type basis sets for the alkaline and alkaline-earth atoms applied to the ground-state potentials for the corresponding dimers, *Theo. Chem. Acc.*, 2004, **111**, 345-351.
4. B. r. O. Roos, R. Lindh, P.-Å. Malmqvist, V. Veryazov, P.-O. Widmark and A. C. Borin, New relativistic atomic natural orbital basis sets for lanthanide atoms with applications to the Ce diatom and LuF<sub>3</sub>, *J. Phys. Chem. A*, 2008, **112**, 11431-11435.
5. P. Å. Malmqvist, B. O. Roos and B. Schimmelpfennig, The restricted active space (RAS) state interaction approach with spin-orbit coupling, *Chem. Phys. Lett.*, 2002, **357**, 230-240.
6. L. F. Chibotaru and L. Ungur, *Ab initio* calculation of anisotropic magnetic properties of complexes. I. Unique definition of pseudospin Hamiltonians and their derivation, *J. Chem. Phys.*, 2012, **137**.
7. F. Aquilante, R. Lindh and T. Bondo Pedersen, Unbiased auxiliary basis sets for accurate two-electron integral approximations, *J. Chem. Phys.*, 2007, **127**, 114107.

8. L. F. Chibotaru, L. Ungur, C. Aronica, H. Elmol, G. Pilet and D. Luneau, Structure, magnetism, and theoretical study of a mixed-valence  $\text{Co}^{\text{II}}_3\text{Co}^{\text{III}}_4$  heptanuclear wheel: Lack of SMM behavior despite negative magnetic anisotropy, *J. Am. Chem. Soc.*, 2008, **130**, 12445-12455.
9. L. F. Chibotaru, L. Ungur and A. Soncini, The origin of nonmagnetic Kramers doublets in the ground state of dysprosium triangles: evidence for a toroidal magnetic moment, *Angew. Chem.*, 2008, **120**, 4194-4197.
10. D. A. Pantazis and F. Neese, All-Electron Scalar Relativistic Basis Sets for the Lanthanides, *Journal of Chem. Theo. Comput.*, 2009, **5**, 2229-2238.
11. B. A. Hess, Relativistic electronic-structure calculations employing a two-component no-pair formalism with external-field projection operators, *Phys. Rev. A*, 1986, **33**, 3742.
12. S. Grimme, J. Antony, S. Ehrlich and H. Krieg, A consistent and accurate ab initio parametrization of density functional dispersion correction (DFT-D) for the 94 elements H-Pu, *J. Chem. Phys.*, 2010, **132**.
13. S. Grimme, S. Ehrlich and L. Goerigk, Effect of the damping function in dispersion corrected density functional theory, *J. Comput. Chem.*, 2011, **32**, 1456-1465.
14. R. Izsák and F. Neese, An overlap fitted chain of spheres exchange method, *J. Chem. Phys.*, 2011, **135**.
15. R. Izsák and F. Neese, Speeding up spin-component-scaled third-order perturbation theory with the chain of spheres approximation: the COSX-SCS-MP3 method, *Mol. Phys.*, 2013, **111**, 1190-1195.
